# Supplementary material for: Bio-inspired engineering of a perfusion culture platform for guided three-dimensional nerve cell growth and differentiation
Source: Royal Society of Chemistry journal article supplement (doi:10.1039/d1lc01149a), 2022-01-01
Supplement: d1lc01149a3.pdf [file d1lc01149a3.pdf]

# Bio-inspired engineering of a perfusable culture platform for guided three-dimensional nerve cell growth and differentiation†

Zihou Wei,<sup>a,b,‡</sup> Tao Sun,<sup>a,b,‡</sup> Shingo Shimoda,<sup>d</sup> Zhe Chen,<sup>c</sup> Xie Chen,<sup>a,b</sup> Huaping Wang,<sup>a,b</sup> Qiang Huang,<sup>a,b</sup> Toshio Fukuda,<sup>a,b,c</sup> Qing Shi,<sup>\*a,b,c</sup>

† These authors contributed equally to this work.

\* Corresponding author. E-mail: shiqing@bit.edu.cn

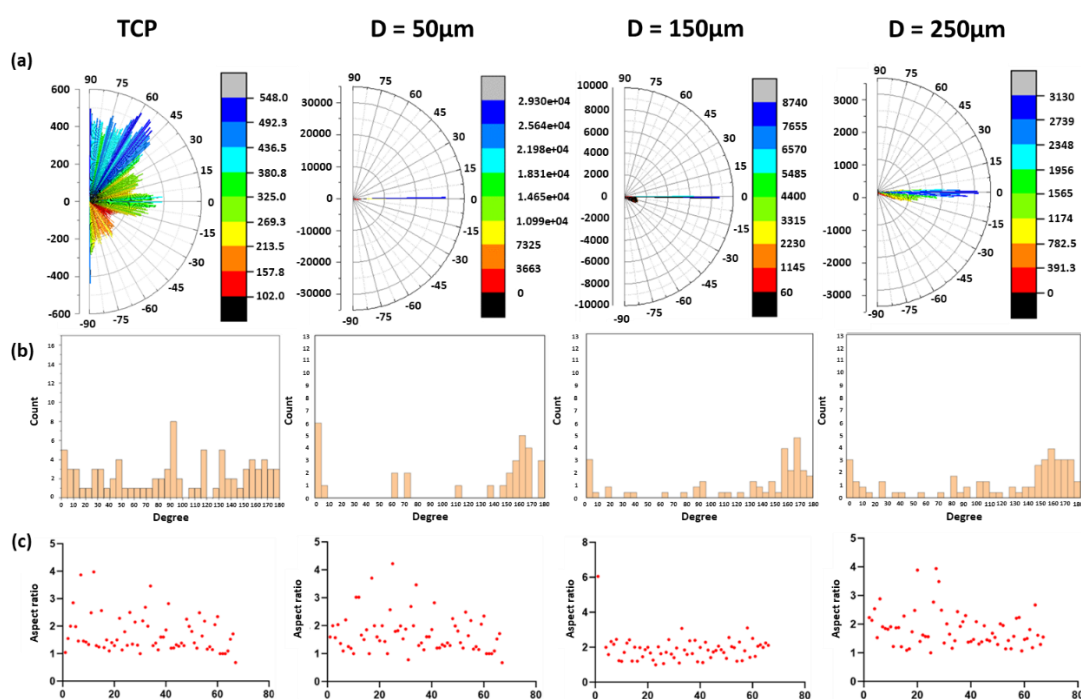

Fig.S1 Evaluation of the extent of orientation about cells 3D cultured in the microtube with different diameters (50µm, 150µm, 250µm), compared with cells 2D cultured on the tissue culture plates (TCP). (a) Polar histogram of the neurites' orientation angles; (b) Histogram of the nucleus orientation angle; (c) Scatter diagram of the nuclear aspect ratio.

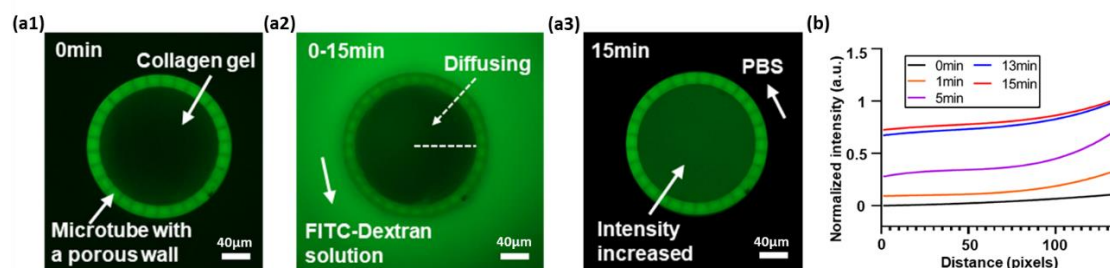

Fig.S2 (a1), (a2), (a3) The process of diffusion experiment; (b) The evolution of the intensity profiles along the dot line (marked in Fig.S2 (a2)).

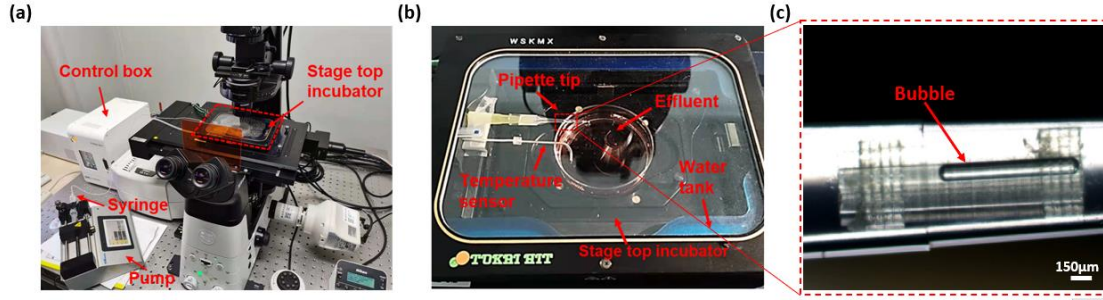

Figure S3. (a) Overview of the perfusion culture platform; (b) The perfusion culture apparatus set-up in the stage top incubator; (c) An image taken during perfusion.

**Table S1. List of the parameters of simulation model**

| Symbol          | Parameter                                   | Value                                       |
|-----------------|---------------------------------------------|---------------------------------------------|
| $D_g$           | Glucose diffusivity                         | $1.0 \times 10^{-9}$ (m <sup>2</sup> /s)    |
| $R$             | Glucose consumption rate                    | $8 \times 10^{-3}$ (kg/(m <sup>3</sup> ·s)) |
| $C$             | Glucose concentration in the culture medium | 4.5 (kg/m <sup>3</sup> )                    |
| $\varepsilon_c$ | Porosity of the collagen gel                | 90%                                         |
| $K_c$           | Permeability of the collagen gel            | $10^{-14}$ (m <sup>2</sup> )                |
| $\rho$          | Culture medium density                      | 0.893 (g/cm <sup>3</sup> )                  |
| $\mu$           | Culture medium viscosity                    | $8.3 \times 10^{-3}$ (g/(cm·s))             |
| $q$             | Volume flow rate of the perfusion medium    | $5 \times 10^{-12}$ (m <sup>3</sup> /s)     |
| $\gamma$        | Mobility                                    | 50 (m·s/kg)                                 |
| $\varepsilon_i$ | Interface thickness                         | $6.5 \times 10^{-6}$ (m)                    |
| $\sigma$        | Surface tension coefficient                 | 72.92 (mN/m)                                |
| $\vartheta$     | Contact angle                               | 10 (°)                                      |
| $p_0$           | Atmospheric pressure                        | 101.325 (kPa)                               |
| $g$             | Gravity acceleration                        | 9.8 (m/s <sup>2</sup> )                     |
| $r$             | Radius of the microtube                     | 75 (µm)                                     |
| $h$             | Height of the microtube                     | 2 (mm)                                      |
| $D_d$           | Diffusion coefficient of the gas molecules  | $1.8 \times 10^{-9}$ (m <sup>2</sup> /s)    |
| $k_H$           | Henry constant                              | $7.3 \times 10^7$ (Pa·kg/mol)               |
| $M$             | Molar mass of the gas                       | $2.9 \times 10^{-2}$ (kg/mol)               |
| $R$             | Universal gas constant                      | 8.314 (J/(mol·K))                           |
| $T$             | Absolute temperature                        | 298.15 (K)                                  |

**Table S2. The statistical results of the cell viability of PC12 cells in the static and perfusable culture condition.**

| Day1/static                                | Day1/perfusable                            | Day7/static                                | Day7/perfusable                            |
|--------------------------------------------|--------------------------------------------|--------------------------------------------|--------------------------------------------|
| Live/Dead=1808/287<br>Cell viability=86.3% | Live/Dead=4104/275<br>Cell viability=94%   | Live/Dead=3415/612<br>Cell viability=85%   | Live/Dead=3484/871<br>Cell viability=81.6% |
| Live/Dead=2264/249<br>Cell viability=90%   | Live/Dead=1581/251<br>Cell viability=86.2% | Live/Dead=1438/604<br>Cell viability=70.4% | Live/Dead=5190/846<br>Cell viability=85.2% |
| Live/Dead=3895/261<br>Cell viability=93.7% | Live/Dead=2200/242<br>Cell viability=91%   | Live/Dead=1141/609<br>Cell viability=58.2% | Live/Dead=9827/855<br>Cell viability=91.7% |

|                |                |                  |                  |
|----------------|----------------|------------------|------------------|
| Mean±SD=90%±3% | Mean±SD=90%±3% | Mean±SD=71.2%±8% | Mean±SD=86.2%±6% |
|----------------|----------------|------------------|------------------|
